# Supplementary material
Source: PubMed Central journal article supplement (PMC4127312)
Supplement: NIHMS579932-supplement-Suppl__Fig__1.pdf [file NIHMS579932-supplement-Suppl__Fig__1.pdf]

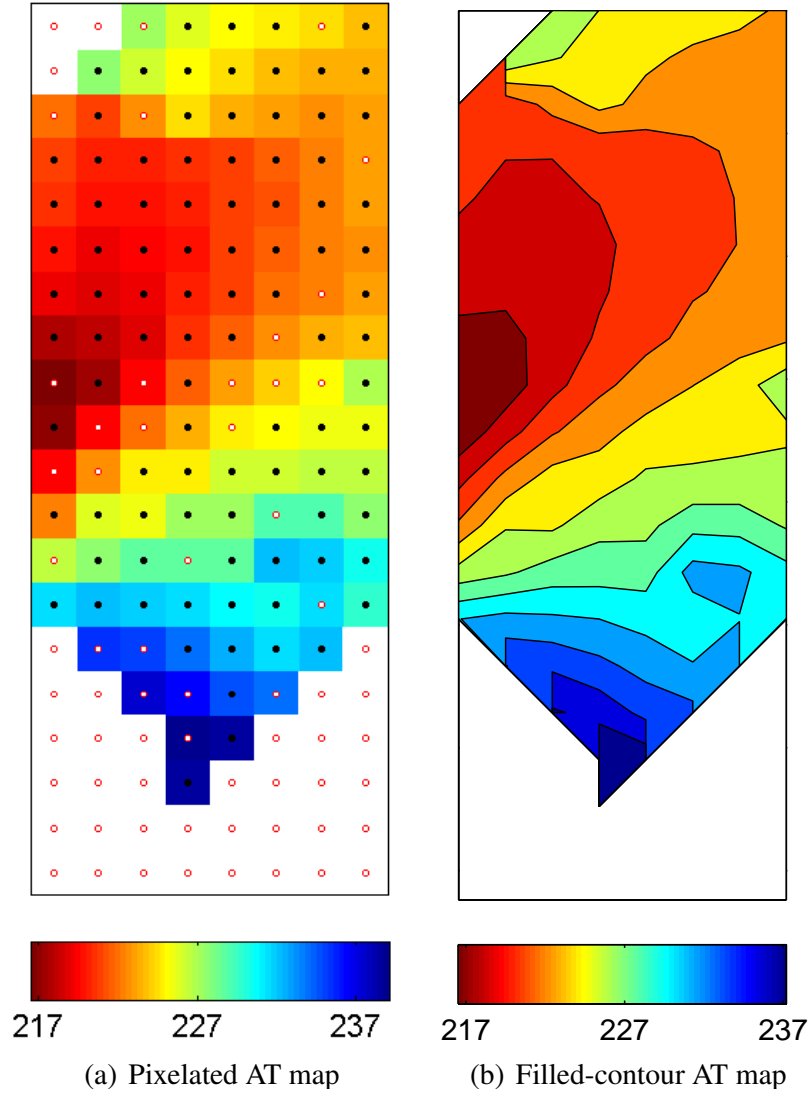

Supplementary Figure 1: Corresponding pixelated (a) and isochronal contour plots (b). In (a), black dots indicate a site at which an AT was marked, whereas white dots with red perimeters indicate electrode sites for which no AT was marked, but in some cases, was interpolated (Section II-F). To be consistent with published conventions [13], [17], the ATs were color coded to propagate from red to blue, representing the earliest and latest ATs, respectively. Conversion from pixelated to smooth contour representation was done with the MATLAB function *contourf*. Isochronal bands are spaced at 2 s intervals. Color bar units: s.
